1  
2  
3  
4  
5  
6  
7  
8  
9  
10  
11  
12  
13  
14  
15  
16  
17  
18  
19  
20  
21  
22  
23

Title: The intrinsic neonatal hippocampal network: rsfMRI findings

Abbreviated Title: The intrinsic neonatal hippocampal network

Authors:

Athena L. Howell (contribution: running registration and fMRI analyses, statistical analyses and writing the manuscript),

David E. Osher (preprocessing fMRI data and editing the manuscript),

Jin Li (preprocessing fMRI data and editing the manuscript),

and Zeynep M. Saygin (PI/advisor, guiding the research and analyses, checking results and editing the manuscript)

The Ohio State University, 43210

Please address correspondence to:

Athena L. Howell, The Ohio State University, 225 Psychology Building, 1835 Neil Avenue,  
Columbus, OH, 43210. E-mail: [howell.551@osu.edu](mailto:howell.551@osu.edu)

# of pages: 19 (in body of manuscript)

# of Figures: 5 Figures

# of words in abstract: 201

24 # of words in introduction: 575

25 # of words in discussion: 1077

26 Acknowledgements; The authors declare no competing financial interests

27  
28  
29  
30  
31  
32  
33  
34  
35  
36  
37  
38  
39  
40  
41  
42  
43  
44  
45  
46  
47  
48  
49

## **Abstract**

Many adults cannot voluntarily recall memories before the ages of 3-5, a phenomenon referred to as “infantile amnesia”. The development of the hippocampal network likely plays a significant part in the emergence of the ability to form long-lasting memories. In adults, the hippocampus has specialized and privileged connections with certain cortical networks, which presumably facilitate its involvement in memory encoding, consolidation, and retrieval. Is the hippocampus already specialized in these cortical connections at birth? And are the topographical principles of connectivity (e.g. long-axis specialization) present at birth? We analyzed resting-state hippocampal connectivity in neonates scanned within one week of birth (Developmental Human Connectome Project) and compared them to adults (Human Connectome Project). We explored the connections of the whole hippocampus and its long-axis specialization to seven canonical cortical networks. We found that the neonatal hippocampal networks show clear immaturity at birth: adults showed hippocampal connectivity that was unique for each cortical network, whereas neonates showed no differentiation in hippocampal connectivity across these networks. Further, neonates lacked long-axis specialization (i.e., along anterior-posterior axis) of the hippocampus in its differential connectivity patterns to the cortical networks. This immaturity in connectivity may contribute to immaturity in memory formation in the first years of life.

50 “New and Noteworthy”:

51           While animal data, and anatomical and behavioral human data from young children  
52 suggest that the hippocampus is immature at birth, to date, there are no direct assessments of  
53 human hippocampal functional connectivity (FC) very early in life. Our study explores the FC of  
54 the hippocampus to the cortex at birth, allowing insight into the development of human memory  
55 systems.

56

## 57 **Introduction**

58           Many adults cannot voluntarily recall memories before the ages of 3-5, a phenomenon  
59 referred to as “infantile amnesia” (Alberini & Travaglia, 2017). One potential reason for this is  
60 that the hippocampus (the primary brain structure responsible for episodic memory formation in  
61 adults) and its connections with the rest of the brain may be immature at birth. Indeed, the  
62 hippocampus does appear to be immature at birth; evidence in macaques suggests it continues to  
63 mature after one year of age (roughly age 3-5 in humans) (Jabés et al., 2011) and human data  
64 indicates that volumetric and structural changes in the hippocampus continue through childhood  
65 (DeMaster et al., 2014; Gilmore et al., 2012; Seress 2007). Further, episodic memory performance  
66 may be influenced by changes in the patterns of hippocampal connectivity from middle childhood  
67 to adulthood, including along the long-axis of the hippocampus (Blankenship et al., 2017;  
68 DeMaster et al., 2014; Ghetti et al., 2010; Gogtay et al., 2006; Poppenk & Moscovitch, 2011;  
69 Riggins et al., 2016). At younger ages, hippocampal gray matter volume has been linked to early  
70 language ability (Can et al., 2013) and one recent study showed potential hippocampal activation  
71 for learned items in 2-year old toddlers (Prabhakar et al., 2018). However, the intrinsic  
72 connectivity of hippocampus very early in life is less well understood. Therefore, an understanding  
73 of the hippocampal network at birth and its development may lead to greater understanding of  
74 memory development.

75           Recently, Wael and colleagues (2018) showed the hippocampus has a clear intrinsic pattern  
76 of functional connectivity (FC) to a set of cortical networks in adults. Specifically, they showed  
77 higher (i.e. most positive) connectivity from the hippocampus to the Default Mode and Limbic  
78 networks and lowest (i.e. least positive) connectivity to the Frontoparietal and Ventral Attention  
79 networks (from Yeo et al., 2011), Further, this connectivity pattern differed between the anterior

80 and posterior portions of the hippocampus, with anterior hippocampus showing larger differences  
81 in connectivity to the networks than posterior hippocampus. This so-called long-axis specialization  
82 of the hippocampus is consistent with previous research showing that the anterior and posterior  
83 hippocampus display different patterns of structural and functional connectivity and may be  
84 uniquely activated in response to cognitive, memory and spatial demands (for reviews see Poppenk  
85 et al., 2013, Strange et al., 2014). The development of the hippocampal network and the long-axis  
86 gradient likely plays a significant part in the emergence of the ability to form long-lasting  
87 memories. For instance, the work of Riggins et al. (2016) examines the relationship of  
88 anterior/posterior connectivity and episodic memory in 4- and 6-year old children and finds  
89 developmental differences even between these two ages. Although this work in young children is  
90 notable, the fact remains that we know very little about the hippocampus, its connections, and its  
91 relationship to memory-formation during the earliest stages of life.

92 To this end, we compared the resting-state hippocampal connectivity patterns to a set of  
93 cortical networks in neonates and adults. Resting state connectivity, determined by spontaneously  
94 correlated activity of disparate brain regions, is used as a reliable marker of intrinsic functional  
95 connectivity (FC) between brain regions (Biswal et al., 1995; Raichle, 2009; Smith, 2013; Sporns,  
96 2013); further, FC at rest is predictive of task-based activity (Cole et al., 2014; Osher et al., 2019;  
97 Smith et al., 2009; Tobyne et al., 2018).

98 More recently, developmental studies using FC have shown the FC of some networks is  
99 mature at birth while others take months or longer to become adultlike (for reviews see Gao et al.,  
100 2017 and Grayson & Fair, 2017). In particular, multiple studies indicate the connectivity of visual  
101 and somatomotor networks is not only functional but highly adult-like at birth (Gao et al., 2015b;  
102 Lin et al., 2008; Liu et al., 2008). Other areas, such as the default mode network, dorsal attention

103 network, frontoparietal network, and some perceptual regions show relatively immature functional  
104 and structural characteristics at birth and experience large modifications postnatally (Gao et al.,  
105 2015b; Natu et al., 2019), although the frontoparietal network may have important functional roles  
106 even within the first year of life (e.g. Linke et al., 2018).

107 To assess hippocampal maturity at birth, we analyzed FC between seven intrinsic networks  
108 and the hippocampus as a whole as well as along the hippocampal long-axis in both neonates and  
109 adults. We also compared neonatal vs. adult hippocampal connectivity to the cortex at a finer,  
110 voxelwise scale. Based on previous literature suggesting the immaturity of the hippocampus at  
111 birth, we hypothesized that neonates would differ from adults in their hippocampal connectivity  
112 to the cortex, particularly to the more immature networks (e.g. default mode and frontoparietal).

113

## 114 **Materials and Methods**

### 115 **Participants**

#### 116 Neonates:

117 Neonatal data comes from the initial release of the Developing Human Connectome Project  
118 (dHCP) (<http://www.developingconnectome.org>, Markopoulos et al., 2018). Neonates were  
119 recruited and imaged in London at the Evelina Neonatal Imaging Centre after gathering informed  
120 parental consent to image and release the data. The study was approved by the UK Health Research  
121 Authority. 40 neonates were included in our analyses (15 female, 36-44 weeks old at scan).

#### 122 Adults:

123 Adult data comes from the Human Connectome Project (HCP), WU-Minn HCP 1200  
124 Subject Data Release (<https://www.humanconnectome.org/study/hcp-young-adult>, Van Essen et  
125 al., 2013). Participants were scanned at Washington University in St. Louis (WashU). We included

126 40 participants in our analyses (15 female; 20-35 years old). These adult participants were motion-  
127 matched to the neonates. Specifically, we matched each neonatal participant with an adult from  
128 the HCP dataset with the same gender who showed the most similar motion parameter (i.e.,  
129 framewise displacement, FD). While the resulting group of adults were motion-matched to the  
130 neonates, we found that the groups were significantly different in the average gray-matter tSNR,  
131 with neonates exhibiting higher tSNR values ( $t(78)=-6.8774, p=1.3469 \times 10^{-9}$ ). To ensure that any  
132 results were not driven by tSNR differences between groups, we identified an additional group of  
133 HCP adults whose tSNR was matched to the tSNR of the neonates ( $t(78)=-1.5237, p=.132$ ) and  
134 replicated our results (see Extended Data, Figure 1-1).

135

## 136 **MRI Acquisition**

### 137 Neonates:

138 All acquisition information comes from the dHCP data release documentation. Imaging  
139 was carried out on a 3T Philips Achieva (running modified R3.2.2 software) using an imaging  
140 system specifically designed for neonates with a 32 channel phased array head coil (Hughes, E.J.,  
141 et al.). Neonates were scanned during natural sleep; resting-state FC patterns have been shown to  
142 stay largely consistent while awake, asleep, or under anesthesia (Liu et al., 2015; Larson-Prior et  
143 al., 2009).

144

### 145 *Resting-state fMRI*

146 High temporal resolution fMRI developed specifically for neonates was collected using  
147 multiband (MB) 9x accelerated echo-planar imaging (TE/TR=38/392ms, voxel size = 2.15 x 2.15  
148 x 2.15mm<sup>3</sup>). The resting state scan lasted approximately 15 minutes and consisted of 2300 volumes



149 for each run. No in-plane acceleration or partial Fourier transform was used. Single-band reference  
150 scans with bandwidth matched readout and additional spin-echo acquisitions were also acquired  
151 with both AP/PA fold-over encoded directions.

152

### 153 *Anatomical MRI*

154 High-resolution T2-weighted and inversion recovery T1-weighted multi-slice fast spin-  
155 echo images were acquired with in-plane resolution  $0.8 \times 0.8\text{mm}^2$  and 1.6mm slices overlapped  
156 by 0.8mm (T2-weighted: TE/TR= 156/12000ms; T1 weighted: TE/TR/TI = 8.7/4795/1740ms)

157

### 158 Adults:

159 All acquisition information comes from the HCP data release documentation. Scanning for  
160 the 1200 WU-Minn HCP subject was carried out on a customized 3T Connectome Scanner adapted  
161 from a Siemens Skyra (Siemens AG, Erlanger, Germany), equipped with a 32-channel Siemens  
162 receiver head coil and a “body” transmission coil specifically designed by Siemens to  
163 accommodate the smaller space (due to special gradients) of the WU-Minn and MGH-UCLA  
164 Connectome scanners.

165

### 166 *Resting-State fMRI*

167 Participants were scanned using the Gradient-echo EPI sequence (TE/TR = 33.1/720ms,  
168 flip angle =  $52^\circ$ , 72 slices, voxel size =  $2 \times 2 \times 2\text{mm}^3$ ). Scanning lasted approximately 15 minutes  
169 consisting of 1200 volumes for each run. Each participant finished two resting-state fMRI sessions.  
170 For each session, two phases were encoded: one right-to-left (RL) and the other left-to-right (LR).  
171 For our analyses, we used the LR phase encoding from the first session. Participants were

172 instructed to relax and keep their eyes open and fixated on a bright, projected cross-hair against a  
173 dark background.

174

### 175 *Anatomical MRI*

176 High-resolution T2-weighted and T1-weighted images were acquired with an isotropic  
177 voxel resolution of  $0.7\text{mm}^3$  (T2-weighted 3D T2-SPACE scan: TE/TR=565/3200ms; T1-weighted  
178 3D MPRAGE: TE/TR/TI = 2.14/2400/1000ms).

179

### 180 **MRI Preprocessing**

#### 181 Neonates:

182 The dHCP data was preprocessed using the dHCP minimal preprocessing pipelines  
183 (Makropoulos et al., 2018). Anatomical MRI preprocessing included bias correction, brain  
184 extraction using BET from FSL (FMRIB Software Library) and segmentation of the T2w volume  
185 using their DRAW-EM algorithm (Makropoulos et al., 2014). The resulted gray and white matter  
186 segmentations were used as anatomical masks in further analyses; these masks were manually  
187 checked for accuracy.

188 Minimal preprocessing for the resting-state fMRI included (Fitzgibbon et al., 2016)  
189 distortion correction, motion correction, 2-stage registration of the MB-EPI functional image to  
190 the T2 structural image, temporal high-pass filtering (150s high-pass cutoff), and ICA denoising  
191 using FSL's FIX (Salimi-Khorshidi, et al., 2014). In addition to this minimal preprocessing, we  
192 smoothed the data (Gaussian filter, FWHM = 3mm) across the gray matter, and applied a band-  
193 pass filter at 0.009-0.08 Hz. To further denoise the data, we used aCompCor (Behzadi et al., 2007)

194 to regress out physiological noise (heartbeat, respiration, etc.) from the white matter and  
195 cerebrospinal fluid (CSF).

196 Adults:

197 HCP data was preprocessed using the HCP minimal preprocessing pipelines (Glasser et al.,  
198 2013). For the anatomical data, a Pre-FreeSurfer pipeline was applied to correct gradient distortion,  
199 produce an undistorted “native” structural volume space for each adult participant by ACPC  
200 registration (hereafter referred to as “acpc space”), extract the brain, perform a bias field  
201 correction, and register the T2-weighted image to the T1-weighted image. Additionally, each  
202 participant’s brain was aligned to a common MNI152 template brain (with 0.7mm isotropic  
203 resolution). Then, the FreeSurfer pipeline (based on FreeSurfer 5.3.0-HCP) was performed with a  
204 number of enhancements specifically designed to capitalize on HCP data (Glasser et al., 2013).  
205 The goal of this pipeline was to segment the volume into predefined structures, to reconstruct the  
206 white and pial cortical surfaces, and to perform FreeSurfer’s standard folding-based surface  
207 registration to their surface atlas (fsaverage).

208 For the resting-state fMRI data, minimal functional analysis pipelines included: removing  
209 spatial distortions, motion correction, registering the fMRI data to structural and MNI152  
210 templates, reducing the bias field, normalizing the 4D image to a global mean, and masking the  
211 data with the final brain mask. After completing these steps, the data were further denoised using  
212 the ICA-FIX method (Salimi-Khorshidi, et al., 2014). To mirror the adult and neonatal  
213 preprocessing pipelines, we unwarped the data from MNI152 to acpc space, allowing both groups  
214 to be analyzed in “native” space. We then applied spatial smoothing (Gaussian filter, FWHM =  
215 3mm) within the gray matter, band-pass filtered at 0.009-0.08 Hz and implemented aCompCor to  
216 regress out physiological noise, just as we did with the neonates.

217 All subsequent analyses in neonates and adults were performed in each subject's native  
218 space, except for the whole-brain voxelwise analysis.

### 219 **Connectivity analyses**

220 We used the 7-network cortical parcellation identified by Yeo et al. (2011). For the  
221 whole-hippocampus and long-axis analyses, the hippocampal label was binarized from  
222 FreeSurfer's ([surfer.nmr.mgh.harvard.edu](http://surfer.nmr.mgh.harvard.edu)) `aparc+aseg` parcellation and visually inspected for  
223 accuracy in each subject. For the first long-axis gradient analysis this label was further sectioned  
224 into anterior and posterior portions via manual segmentation using FreeSurfer, with the uncus  
225 apex as the dividing marker (Poppenk & Moscovitch., 2011). All labels (cortical networks,  
226 hippocampal labels) were originally in CVS average-35 MNI152 space and then registered to  
227 each individual subject's anatomical data using ANTs (Advanced Normalization Tool)  
228 `3dWarpMultiTransform` (ANTs version 2.1.0; <http://stnava.github.io/ANTs>; Avants et al., 2011).  
229 ANTs is routinely used for developmental dataset registrations (Alexander et al., 2019; Dean et  
230 al., 2018). The resulting registrations were checked for accuracy. Similarly, for the long-axis  
231 gradient analysis, the hippocampal label in CVS was split into nine equally spaced "slices" along  
232 the anterior-posterior axis. Using the same ANTs registration technique for all ROIs provided an  
233 extra measure of consistency between groups and between analyses; however, as an added  
234 quality check we ran our whole-hippocampus to network analysis using the binarized  
235 hippocampal label provided by the dHCP and HCP for each individual. These second results are  
236 nearly identical (see Extended Data, Figure 2-1) to the first (Figure 2) thus increasing confidence  
237 that our results are not due to registration error.

238 After registration to the anatomical data, we registered the labels onto the functional data  
239 in neonates using an inverse warp of the `func2anat` matrix provided by the dHCP. In adults, the

240 labels in acpc space after ANTs registration were then resampled to 2mm cubic voxels to align  
241 with the functional data. We manually checked individuals from each sample to ensure the  
242 accuracy and fit of the labels to the individual functional data. We extracted the BOLD activation  
243 in each label over the time course, averaged within each label, and correlated the hippocampal  
244 activity—first whole hippocampus, then along the long-axis (for both anterior-posterior and  
245 gradient slices)—with activity in each of the 7 networks to create a Fisher’s Z-scored correlation  
246 matrix using Matlab 2018b (The MathWorks, Inc., Natick, Massachusetts, United States).  
247 We also explored differences in the hippocampal connectivity to the whole cortex at a voxelwise  
248 scale between adults and neonates to determine whether specific regions within the networks were  
249 driving adult-neonate differences. Hippocampal connectivity to the cortex was calculated by  
250 correlating the average hippocampal signal and the signal of each voxel within the cortical gray  
251 matter mask during the time course for each individual in functional space. To compare the  
252 connectivity between adults and neonates, images from both groups were registered to the template  
253 space (i.e., CVS average-35 MNI152) before running a between-group analysis. Although this is  
254 the only template-space analysis we performed, template-space analyses have been routinely  
255 performed to compare infants to adults using similar registration methods (e.g. Gao et al., 2009;  
256 Gao et al., 2015a).

## 257 **Experimental Design and Statistical Analyses**

258 Where t-tests were performed between regions we corrected for multiple comparisons  
259 using the Holm-Bonferroni correction (Holm, 1979); all connectivity values were Fisher’s Z  
260 transformed (Fisher, 1915) to normalize the data.

261 Before doing any of the planned analyses, we first performed data quality checks. To make  
262 sure there was no significant motion difference between groups, we calculated the framewise

263 displacement (FD) (Power et al., 2012) based on the six motion parameters estimated from a rigid-  
264 body transformation provided by dHCP and HCP. We manually checked the registration of the  
265 gray and white matter masks as well as the network and hippocampal labels in the adults and  
266 neonates to the registration was accurate. Because we are performing comparisons of correlations  
267 between groups, we next wanted to ensure that the correlation distributions were similar and were  
268 normally distributed in both neonates and adults; we did this by assessing the correlation of each  
269 voxel to every other voxel in the brain and plotting the distribution of those correlations. We also  
270 performed between-subject reliability of correlation matrices within and across the adult and  
271 neonate groups. We calculated the connectivity of each region (i.e. each of the seven networks and  
272 the hippocampus) to every other region for each subject. This connectivity matrix was then  
273 correlated with every other subject's value either between- or within-groups to assess inter-subject  
274 reliability; in other words, we correlated the connectivity of every adult to every other adult  
275 (within-group) and neonate to neonate, as well as comparing every adult to every neonate  
276 (between-group).

277 Our first analysis examined the relationship of the whole hippocampus to the seven cortical  
278 networks. After running a one-way ANOVA with network as the independent variable and  
279 connectivity as the dependent variable for both groups, we computed pairwise comparisons  
280 between each unique combination of connectivity values to the networks (e.g. Hipp-Lim vs Hipp-  
281 VA) to determine networks with significantly different FC to the hippocampus (Snedecor and  
282 Cochran, 1989). Rose plots comparing the connectivity pattern of adults and neonates were created  
283 by subtracting the mean connectivity across all networks from each individual network (for adults  
284 and neonates separately) and plotting the resulting magnitude to show the relative connectivity

285 patterns of the hippocampus to the networks for each group and to compare these patterns between  
286 groups.

287 For our hippocampal-cortical voxelwise analysis, we used FSL's randomise function to  
288 compare between groups and perform permutation testing (to correct for multiple comparisons) in  
289 order to determine areas of greater connectivity in adults vs neonates and visa versa. After mapping  
290 the individual correlation matrices from subject space into a common template space, we used  
291 randomise with default 5000 permutations and clustered the results using FSL's threshold-free  
292 cluster enhancement (TFCE), which corrects for family-wise error (FWE). This produced a list of  
293 potential clusters with each cluster's associated p-value; the p-values were then thresholded at a  
294  $p < 0.0005$ , and only those clusters that remained significant after that point are reported in this  
295 paper.

296 For the first long-axis hippocampus analysis, we first computed a two-way ANOVA in  
297 each group (separately) using location (i.e. anterior or posterior hippocampus) and network as  
298 independent variables and FC as the dependent variable. Pairwise comparisons were then made  
299 between the anterior and posterior FC values to each network for each group (e.g. adult antHipp-  
300 Lim vs adult postHipp-Lim). For the second long-axis analysis, we conducted a two-way ANOVA  
301 at each slice using group and network as independent variables and connectivity as the dependent  
302 variable. We also computed a one-way ANOVA at each slice for each group with network as the  
303 independent variable. As in the whole-hippocampal analysis, rose plots were created by  
304 subtracting out the mean connectivity to all networks (e.g. mean connectivity of adult anterior  
305 hippocampus to all networks) from each network and group in the anterior and posterior labels  
306 individually to demonstrate comparative connectivity differences between the anterior and  
307 posterior regions in each group.

308 **Results**

309 (FIGURE 1 HERE)

310 **Preliminary data-checks**

311 Comparison of the framewise displacement in adults and neonates showed no significant  
312 difference of FD between adults and neonates ( $t(78)=-0.48$ ,  $p=0.63$ ). Visual inspection of the  
313 gray and white matter masks (which are critical for resting-state preprocessing) in Figure 1a  
314 shows they are accurately delineating gray/white matter in both neonates and adults; the cortical  
315 networks and hippocampal labels also appear to be correctly localized, suggesting that the  
316 regions are accurately identified in both neonates and adults (Figure 1a). Figure 1b demonstrates  
317 that both neonates and adults have normally-distributed correlation values that are centered  
318 around 0. Between-subject reliability of correlation matrices within and across the adult and  
319 neonate groups showed the connectivity matrices (i.e. region-to-region connectivity of each of  
320 the seven networks and the hippocampus to each other) of each adult subject to each other adult  
321 subject were highly correlated, as were the matrices of each neonate subject to each other  
322 neonate subject, and a pairwise comparison of subject variability within groups (e.g. adult-adult  
323 correlations compared to neonate-neonate correlations) was not significant ( $t(78)=0.76$ ,  $p=0.45$ ).  
324 But subject-to-subject correlations across the two groups were significantly lower than the  
325 within-group correlations (adult-adult vs adult-neo  $t(78) = 14.09$ ,  $p=3.87 \times 10^{-23}$ , neonate-neonate  
326 vs adult-neonate ( $t(78)=11.95$ ,  $p=2.63 \times 10^{-19}$ ) suggesting that while the connectivity data are  
327 reliable, neonates have different connectivity patterns than adults.

328 **Whole Hippocampus**

329 We first explored the connectivity of the whole hippocampus to the cortical networks. In  
330 adults, there was a main effect of network suggesting that some networks are more strongly



331 connected with the hippocampus than others (Figure 2; one-way ANOVA,  $F(6,273)=47.11$ ,  
332  $p=1.84 \times 10^{-39}$ ). Subsequent pairwise comparisons showed a clear hierarchy of connectivity, such  
333 that hippocampal connectivity was highest to the Limbic (Lim) network (vs hippocampal  
334 connectivity to: Ventral Attention or VA ( $t(78)=12.95$ ,  $p_{HB}=8.42 \times 10^{-20}$ ); FrontoParietal or FP  
335 ( $t(78)=11.76$ ,  $p_{HB}=1.20 \times 10^{-17}$ ), Dorsal Attention or DA ( $t(78)=10.09$ ,  $p_{HB}=1.50 \times 10^{-14}$ ); Visual or  
336 Vis ( $t(78)=7.20$ ,  $p_{HB}=4.52 \times 10^{-9}$ ); and SomatoMotor or SM ( $t(78)=5.97$ ,  $p_{HB}=7.91 \times 10^{-7}$ )).  
337 Hippocampal connectivity to the Default Mode Network (DM) was higher than hippocampal  
338 connectivity to: VA ( $t(78)=10.32$ ,  $p_{HB}=5.80 \times 10^{-15}$ ); FP ( $t(78)=9.07$ ,  $p_{HB}=1.33 \times 10^{-12}$ ); DA  
339 ( $t(78)=7.24$ ,  $p_{HB}=4.04 \times 10^{-9}$ ); Vis ( $t(78)=4.63$ ,  $p_{HB}=1.45 \times 10^{-4}$ ); and SM ( $t(78)=3.16$ ,  $p_{HB}=0.014$ )).  
340 Hippocampal-SM connectivity was 3<sup>rd</sup> highest, and higher than hippocampal connectivity to: VA  
341 ( $t(78)=7.83$ ,  $p_{HB}=3.19 \times 10^{-10}$ ); FP ( $t(78)=6.46$ ,  $p_{HB}=1.09 \times 10^{-7}$ ); and DA ( $t(78)=4.35$ ,  
342  $p_{HB}=3.61 \times 10^{-4}$ )). Hippocampal-Vis connectivity was the next highest (vs VA ( $t(78)=5.49$ ,  
343  $p_{HB}=5.31 \times 10^{-6}$ ); FP ( $t(78)=4.16$ ,  $p_{HB}=6.38 \times 10^{-4}$ ), and connectivity with DA was higher than with  
344 VA ( $t(78)=3.89$ ,  $p_{HB}=1.47 \times 10^{-3}$ ). In summary, hippocampal connectivity was highest to Lim,  
345 followed by DM, then SM, Vis, and DA; hippocampal connectivity was lowest (i.e. negatively  
346 correlated) with the FP and VA networks. In previous literature, the hippocampus is occasionally  
347 included as a part of the DM network; our finding of high Hippocampal-DM correlation and  
348 anti-correlation between the hippocampus and attention (i.e. FP and VA) networks falls in line  
349 with earlier work on the connectivity of the DM network (e.g. Buckner, Andrews-Hanna &  
350 Schacter, 2008) and is a good sign of the reliability of our results.

351 In contrast to the adult pattern, although neonates did show a main effect of network  
352 ( $F(6,273)=5.12$ ,  $p=2.27 \times 10^{-5}$ ), pairwise comparisons indicated that only the Lim and SM  
353 networks significantly differ from the rest, with significantly greater connectivity from the

354 hippocampus to Lim vs DA (( $t(78)=5.31$ ,  $p_{HB}=2.15 \times 10^{-5}$ ) and Lim vs FP ( $t(78)=4.22$ ,  
355  $p_{HB}=1.33 \times 10^{-3}$ ) and significantly greater connectivity to SM vs DA( $t(78)=3.35$ ,  $p_{HB}=0.023$ ).

356 Pairwise comparisons between adults and neonates showed significant differences  
357 between the groups, with significantly less connectivity in adults to Vis ( $t(78)=-2.64$ ,  
358  $p_{HB}=0.040$ ), DA( $t(78)=-2.77$ ,  $p_{HB}=0.035$ ), FP( $t(78)=-5.33$ ,  $p_{HB}=5.49 \times 10^{-6}$ ) and VA ( $t(78)=-8.62$ ,  
359  $p_{HB}=5.86 \times 10^{-13}$ ) networks compared to neonates.

### 360 (FIGURE 2 HERE) **Hippocampus to Cortex voxelwise analysis**

361 We next explored the connectivity of the hippocampus to the entire cortex at a voxelwise  
362 scale; because our previous analysis only focused on 7 canonical networks, we may have missed  
363 differences between neonates and adults at a finer grain than that seen on a network level.  
364 Thresholding the unpaired t-test results of the whole-brain clusters at  $p < 0.0005$  produced 26  
365 significant FWE-corrected (Smith & Nichols, 2009) clusters in the neonates > adults comparison  
366 (i.e. 26 clusters where neonatal hippocampal FC significantly exceeds adult hippocampal FC)  
367 and 14 significant clusters in the adults > neonates comparison (Figure 3). Specifically, neonates  
368 show greater hippocampal FC to frontal and parietal areas, bilateral lingual and pericalcarine  
369 cortex and cuneus when compared to adults; frontoparietal differences were particularly  
370 prevalent within the right hemisphere. Adults, on the other hand, displayed greater hippocampal  
371 FC than the neonates primarily to bilateral isthmus cingulate and precuneus. Cluster sizes and  
372 indices for clusters greater than 200 voxels along with peak voxel location and associated brain  
373 regions are reported in Figures 3-1 and 3-2 and largely follow the results from the 7-network  
374 analysis—the neonatal hippocampus shows greater FC to frontoparietal and attention-relevant  
375 areas, whereas the adult hippocampus shows greater FC with regions associated with the default  
376 mode and limbic networks.

377 (FIGURE 3 HERE)

### 378 **Anterior-Posterior Hippocampus**

379 We next explored the anterior vs. posterior hippocampal connectivity patterns in neonates  
380 and adults; previous literature in both humans and other animals suggest functional  
381 differentiation of the anterior and posterior hippocampal segments, and thus we may expect these  
382 segments to have differences in FC to the 7 cortical networks. In adults, a two-way ANOVA  
383 indicated a main effect of network ( $F(6,546)=60.04$ ,  $p=5.04 \times 10^{-57}$ ) and an interaction between  
384 network and anterior/posterior hippocampus ( $F(6,546)=14.31$ ,  $p=3.54 \times 10^{-15}$ ) (Figure 4).  
385 In neonates, the two-way ANOVA showed only a significant main effect for network  
386 ( $f(6,546)=7.67$ ,  $p=6.30 \times 10^{-8}$ ) (Figure 4). Pairwise comparisons between the anterior and  
387 posterior portions of the hippocampus in adults show greater anterior vs posterior connectivity to  
388 the Lim ( $t(78)=3.53$ ,  $p_{HB}=0.0035$ ), DMN ( $t(78)=2.38$ ,  $p_{HB}=0.03$ ) and SM ( $t(78)=3.19$ ,  
389  $p_{HB}=0.0082$ ) networks, and decreased anterior vs posterior connectivity to the DA ( $t(78)=-3.07$ ,  
390  $p_{HB}=0.0087$ ), Frontoparietal ( $t(78)=-5.79$ ,  $p_{HB}=9.99 \times 10^{-7}$ ) and VA ( $t(78)=-3.92$ ,  $p_{HB}=0.0011$ )  
391 networks. These results suggest the anterior hippocampus was primarily driving the negative  
392 correlations with VA & FP seen at the level of the whole hippocampus in adults. Neonates,  
393 however, show no significant differences between the anterior and posterior portions of the  
394 hippocampus to any of the networks, suggesting no differentiation/specialization of the  
395 hippocampal segments in their connections to the rest of the brain.

396 (FIGURE 4 HERE)

### 397 **Long-Axis Gradient**

398 Finally, we investigated the long-axis gradient, which has been demonstrated to map onto  
399 a differential functional gradient of the hippocampus. We broke up the hippocampus in each

400 subject into 9 different segments along the anterior-posterior axis and compared the 7-network  
401 connectivity to these segments in neonates and adults. Adults showed clear differentiation of  
402 network connectivity along the long-axis while neonates showed no clear differentiation (Figure  
403 5). The Lim and DM in adults appeared to have an initial rise and fall of FC along the anterior-  
404 posterior gradient of the hippocampus which differentiated them from the Vis, SM, and DA, and  
405 the FP and VA showed a similar rise and fall of negative FC along the gradient. One-way  
406 ANOVAs for adults and neonates at each slice indicated a main effect of network in adults in all  
407 but the most posterior slice (Slice 1 ( $F(6,273)=23.61$ ,  $p=1.89 \times 10^{-22}$ ), Slice 2 ( $F(6,273)=40.45$ ,  
408  $p=4.19 \times 10^{-35}$ ), Slice 3 ( $F(6,273)=50.09$ ,  $p=2.61 \times 10^{-41}$ ), Slice 4 ( $F(6,273)=49.56$ ,  $p=5.48 \times 10^{-41}$ ),  
409 Slice 5 ( $F(6,273)=49.07$ ,  $p=1.11 \times 10^{-40}$ ), Slice 6 ( $F(6,273)=25.10$ ,  $p=1.12 \times 10^{-23}$ ), Slice 7  
410 ( $F(6,273)=13.40$ ,  $p=2.57 \times 10^{-13}$ ), Slice 8 ( $F(6,273)=5.51$ ,  $p=2.12 \times 10^{-5}$ )). In the neonates, there  
411 was no main effect of network in any of the slices (at  $p < 0.001$ ). To compare between the two  
412 groups, we performed two-way ANOVAs (with network and group as independent variables and  
413 FC value as the dependent variable) for each of the 9 slices. There was a significant interaction  
414 between network and group for the anterior 7 slices (Slice 1 ( $F(6,546)=7.30$ ,  $p=1.64 \times 10^{-7}$ ), Slice  
415 2 ( $F(6,546)=16.25$ ,  $p=2.95 \times 10^{-17}$ ), Slice 3 ( $F(6,546)=18.98$ ,  $p=3.99 \times 10^{-20}$ ), Slice 4  
416 ( $F(6,546)=17.22$ ,  $p=2.83 \times 10^{-18}$ ), Slice 5 ( $F(6,546)=17.93$ ,  $p=5.05 \times 10^{-19}$ ), Slice 6 ( $F(6,546)=5.79$ ,  
417  $p=7.26 \times 10^{-6}$ ), Slice 7 ( $F(6,546)=4.87$ ,  $p=7.27 \times 10^{-5}$ ) and Slice 8 ( $F(6,546)=3.89$ ,  $p=8.26 \times 10^{-4}$ ), but  
418 no group differences for the most posterior slice. These results show that the biggest  
419 differentiation of hippocampal connectivity to the 7 networks occurs in the anterior 2/3s of the  
420 hippocampus in adults and that neonates do not show this differentiation.

421 (FIGURE 5 HERE)

422 **Discussion**

423 Our results show that the intrinsic connectivity of the hippocampal network is not fully  
424 mature at birth. Previous functional and volumetric evidence in both non-human primates and  
425 humans suggests that the hippocampus continues to develop beyond one year of age, even into  
426 middle childhood (Blankenship et al., 2017; Jabes et al., 2011; Keresztes et al., 2018; Lavenex  
427 and Banta Lavenex, 2013; Riggins et al., 2016). Although there is some evidence to suggest that  
428 the hippocampus is playing a key role in memory formation even early on in rodents (Alberini &  
429 Travaglia, 2017; Travaglia et al., 2018), it has been suggested that the long-lasting memories of  
430 very young children may be created in a fundamentally different way from adult long-term  
431 memories and may rely on cortical mechanisms rather than the traditional hippocampal method  
432 (Ellis & Turke-Browne, 2018; Gómez & Edgkin, 2016). Interestingly, multiple studies  
433 comparing preterm to term infants show no differences in gray matter volume in the  
434 hippocampus with decreased gestational age, implying the better part of hippocampal growth is  
435 accomplished prior to birth (Alexander et al., 2019; Ge et al., 2015; Thompson et al., 2008); our  
436 work suggests that although the physical bulk of the hippocampus may exist at birth, its  
437 connections do not. Specifically, the hippocampus does not have preferential connectivity to any  
438 particular network at birth and lacks any long-axis gradient of connectivity, suggesting that the  
439 hippocampus, the cortical networks it interacts with, or some combination of both, are immature  
440 at birth and may therefore be unable to form long-term memories using adult-like mechanisms.  
441 Indeed, the cortex itself is still maturing early on (e.g. Gao et al., 2015b; Ofen et al., 2007;  
442 Salzwedel et al., 2019) and it is likely this cortical immaturity, in addition to hippocampal  
443 immaturity, is contributing to the differences in memory formation between adults and neonates.  
444 Adults showed a clear hierarchy of FC to the seven networks (consistent with Wael et al.  
445 (2018)), whereas neonates lacked this hierarchy. Further, the comparison between adults and

446 neonates shows significant differences between groups to all networks except the SM network,  
447 and only marginally significant differences between groups in the Vis and DA networks. The  
448 similarity between adults and neonates in connectivity to the SM and Vis networks may be due  
449 to the relative maturity of these areas at birth (Arcaro & Livingstone, 2017; Deen et al., 2017;  
450 Hurk et al., 2017; Gao et al. 2017, Dall’Orso et al., 2018).

451 To more specifically determine which regions in the networks were responsible for the  
452 differences seen between adults and neonates, we conducted a voxel-wise cortical analysis. Our  
453 results indicate that neonates have higher connectivity to much of the cortex as compared to  
454 adults with the exception of areas of bilateral medial orbitofrontal, isthmus cingulate and  
455 precuneus. This is consistent with Riggins et al.’s (2016) conclusion that 4-year old children rely  
456 more on regions “outside” the canonical hippocampal network to complete episodic memory  
457 tasks, and other research suggesting the infant cortex is more broadly tuned than in adults (Ellis  
458 & Turk-Browne, 2018). The few regions where adults display higher FC than neonates reside  
459 mainly within DM network and highlight the immaturity of this network: adults show  
460 significantly greater DM-Hippocampal connectivity than neonates, consistent with Gao et al.’s  
461 (2015) finding that this network is one of the last to develop in the first year of life.

462 Our anterior-posterior analysis and long-axis gradient analyses again suggest that the FC  
463 differentiation of the hippocampus is lacking at birth. Consistent with previous literature, adults  
464 display changes along the long-axis such that the anterior hippocampus shows greater  
465 connectivity to the Lim network than the posterior hippocampus but greater posterior vs anterior  
466 FC to the attention (i.e. FP and VA) networks; in fact, the anterior hippocampus is especially  
467 anti-correlated with these networks, as is consistent with previous literature (Buckner et al.,  
468 2009; Wael et al., 2018). The greatest differentiation in FC to the networks in adults occurred

469 within the anterior two-thirds of the hippocampus. In contrast, neonates showed no specificity to  
470 any of the networks along the long-axis or the anterior-posterior analysis. Blankenship et al.  
471 (2017), Langnes et al. (2018), and Riggins et al. (2016) show evidence of specialization along  
472 the longitudinal axis in 4- and 6-year old children but no such evidence is seen in our results,  
473 suggesting that maturational changes within the hippocampus may occur before age 4 to produce  
474 the preferential connectivity seen in children and adults. Future studies of infants and toddlers  
475 can better elucidate when after birth this change in specialization of the long-axis occurs.

476 Several limitations warrant discussion. A major problem in imaging children is motion  
477 artifact. We used the motion-corrected data that were released by the dHCP, took steps in  
478 preprocessing to ensure that physiological artifacts were removed from the data in both neonates  
479 and adults (Power et al., 2014; Yan et al., 2013), and further motion-matched the neonatal and  
480 adult groups. Given that motion-related artifacts are a major confound in FC analyses (Power et  
481 al., 2012; Satterthwaite et al., 2013), our approach should minimize the risk of spurious  
482 correlations. Other steps we took to minimize potential confounds included visual inspection of  
483 spatial registration results (and using established registration procedures that have been  
484 previously performed on infants (Alexander et al., 2019; Dean et al., 2018; Gao et al., 2009; Gao  
485 et al., 2015a)), performing the analyses in the native-space of each individual, and checking the  
486 reliability of the correlation values across participants in each group to ensure they were not  
487 particularly noisy in the neonatal group. A result of particular note is that neonates showed  
488 primarily positive FC from the hippocampus to the networks, while adults showed slightly  
489 negative FC for some networks. Blankenship et al., (2017) similarly fail to show any negative  
490 hippocampal FC in their sample of 4- and 6-year old children (but this may be due to their  
491 preprocessing steps, see Murphy & Fox, 2017 for discussion). Here, we used the same

492 preprocessing steps in both neonates and adults and used aCompCor and other preprocessing  
493 steps that should not necessarily remove negative correlations if they were there. Indeed, we  
494 found a normal distribution of correlation values in both neonates and adults (Figure 1)  
495 suggesting that negative correlations do exist in neonates, but not between the hippocampus and  
496 the cortex. Further, regardless of the negative vs. positive correlation differences we observe a  
497 difference in the pattern of FC in adults (demonstrated in the rose plots) primarily in the anterior  
498 portion of the hippocampus; this is missing in neonates.

499 Differences in arousal states between the groups present another challenge. Mitra et al.,  
500 (2017) showed differences in resting-state connectivity between sleeping infants and waking  
501 adults. However, observation of Mitra et al.'s data suggests although the magnitude of  
502 connectivity may differ between arousal states, the overall pattern of connectivity remains  
503 similar (i.e. the same clusters of connectivity are observed in sleep and in rest and their relative  
504 comparison to other clusters remains similar across sleep states and age groups). Further,  
505 although notable differences are seen between the 24-mo sleeping infants and waking adults in  
506 Mitra et al., this difference is far less pronounced in the younger 6-mo infants. Based on previous  
507 EEG studies (e.g. Roffwarg, 1966), it is possible that younger infants experience less slow-wave  
508 sleep and more REM sleep and thus, younger infants (vs. older infants) during sleep would be  
509 expected to look more like awake adults due to the high similarity of REM and wakefulness  
510 activity patterns in EEG, particularly in infants. Because we would expect more awake-like REM  
511 sleep and less slow-wave sleep in young infants, we believe that the neonates in the current study  
512 are unlikely to show major wake/sleep confounds in their connectivity patterns. Finally, analysis  
513 of the same dataset but specifically of visual network connectivity showed striking *similarities* in  
514 connectivity patterns (<https://www.biorxiv.org/content/10.1101/712455v1>) and therefore further



515 suggest that any differences in data acquisition and/or sleep states between adults and neonates  
516 are unlikely to systematically lead to the differences in network connectivity that we find here.

517 Finally, we found the motion- and gender-matched HCP adults used this manuscript  
518 tended to have lower tSNR than their respective dHCP counterparts. To ascertain this  
519 discrepancy was not the cause of observed group differences, we identified a separate group of  
520 40 HCP adults whose tSNR matched that of the 40 neonates used here and performed our whole  
521 hippocampus to network analysis on this group. The resulting pattern matches the pattern  
522 observed from the previous analyses (i.e. using the original 40 HCP adults), reiterating that  
523 identified differences in connectivity patterns between adults and neonates are likely not spurious  
524 byproducts of discrepant data quality (Extended Data, Figure 1-1).

525 In conclusion, our results suggest that the resting-state FC patterns of the human  
526 hippocampus are immature at birth. This immaturity may play a key role in infantile amnesia and  
527 the vast differences between adults and neonates shown here suggests a fundamentally different  
528 memory and learning system from that of adults may be present at this point in development.

## 529 **References**

530 Alberini, C. M., & Travaglia, A. (2017). Infantile Amnesia: A Critical Period of Learning to  
531 Learn and Remember. *Journal of Neuroscience*, 37(24), 5783–5795.

532 Alexander, B., Kelly, C. E., Adamson, C., Beare, R., Zannino, D., Chen, J., ... Thompson, D. K.  
533 (2019). Changes in neonatal regional brain volume associated with preterm birth and  
534 perinatal factors. *NeuroImage*, 185, 654–663.

535 Arcaro, M. J., & Livingstone, M. S. (2017). A hierarchical, retinotopic proto-organization of the  
536 primate visual system at birth. *ELife*, 6.

- 537 Avants, B. B., Tustison, N. J., Song, G., Cook, P. A., Klein, A., & Gee, J. C. (2011). A  
538 Reproducible Evaluation of ANTs Similarity Metric Performance in Brain Image  
539 Registration. *NeuroImage*, 54(3), 2033–2044.
- 540 Behzadi, Y., Restom, K., Liau, J. & Liu, T.T.J.N. A component based noise correction method  
541 (CompCor) for BOLD and perfusion based fMRI. *Neuroimage*, 37, 90-101 (2007)
- 542 Biswal, B., Yetkin, F. Z., Haughton, V. M., & Hyde, J. S. (1995). Functional connectivity in the  
543 motor cortex of resting human brain using echo-planar mri. *Magnetic Resonance in*  
544 *Medicine*, 34(4), 537–541.
- 545 Blankenship, S. L., Redcay, E., Dougherty, L. R., & Riggins, T. (2017). Development of  
546 hippocampal functional connectivity during childhood. *Human Brain Mapping*, 38(1),  
547 182–201.
- 548 Buckner, R. L., Andrews - Hanna, J. R., & Schacter, D. L. (2008). The Brain’ s Default  
549 Network. *Annals of the New York Academy of Sciences*, 1124(1), 1–38.
- 550 Buckner, R. L., Sepulcre, J., Talukdar, T., Krienen, F., Liu, H., Hedden, T., ... Johnson, K. A.  
551 (2009). Cortical Hubs Revealed by Intrinsic Functional Connectivity: Mapping, Assessment  
552 of Stability, and Relation to Alzheimer’s Disease. *The Journal of Neuroscience : The*  
553 *Official Journal of the Society for Neuroscience*, 29(6), 1860–1873.
- 554 Can, D. D., Richards, T., & Kuhl, P. (2013). Early gray-matter and white-matter concentration in  
555 infancy predict later language skills: A whole brain voxel-based morphometry study.  
556 *Brain and Language*, 124(1), 34–44. <https://doi.org/10.1016/j.bandl.2012.10.007>
- 557 Cole, M. W., Bassett, D. S., Power, J. D., Braver, T. S., & Petersen, S. E. (2014). Intrinsic and  
558 task-evoked network architectures of the human brain. *Neuron*, 83(1), 238–251.

- 559 Dall’Orso, S., Steinweg, J., Allievi, A. G., Edwards, A. D., Burdet, E., & Arichi, T. (2018).  
560 Somatotopic Mapping of the Developing Sensorimotor Cortex in the Preterm Human Brain.  
561 *Cerebral Cortex*, 28(7), 2507–2515.
- 562 Dean, D. C., Planalp, E. M., Wooten, W., Schmidt, C. K., Kecskemeti, S. R., Frye, C., ...  
563 Davidson, R. J. (2018). Investigation of brain structure in the 1-month infant. *Brain*  
564 *Structure and Function*, 223(4), 1953–1970.
- 565 Deen, B., Richardson, H., Dilks, D. D., Takahashi, A., Keil, B., Wald, L. L., ... Saxe, R. (2017).  
566 Organization of high-level visual cortex in human infants. *Nature Communications*, 8,  
567 13995.
- 568 DeMaster, D., Pathman, T., Lee, J. K., & Ghetti, S. (2014). Structural development of the  
569 hippocampus and episodic memory: Developmental differences along the  
570 anterior/posterior axis. *Cerebral Cortex (New York, N.Y.: 1991)*, 24(11), 3036–3045.
- 571 Ellis, C. T., & Turk-Browne, N. B. (2018). Infant fMRI: A Model System for Cognitive  
572 Neuroscience. *Trends in Cognitive Sciences*, 22(5), 375–387.
- 573 Fisher, R. A. (1915). Frequency Distribution of the Values of the Correlation Coefficient in  
574 Samples from an Indefinitely Large Population. *Biometrika*, 10(4), 507.
- 575 Fitzgibbon, S.P., et al. The developing Human Connectome Project (dHCP): minimal 406  
576 functional pre-processing pipeline for neonates. in *Fifth Biennial Conference on Resting*  
577 *State and Brain Connectivity* (2016)
- 578 Gao, W., Alcauter, S., Elton, A., Hernandez-Castillo, C. R., Smith, J. K., Ramirez, J., & Lin, W.  
579 (2015). Functional Network Development During the First Year: Relative Sequence and  
580 Socioeconomic Correlations. *Cerebral Cortex (New York, NY)*, 25(9), 2919–2928.

- 581 Gao, W., Alcauter, S., Smith, J. K., Gilmore, J., & Lin, W. (2015). Development of Human Brain  
582 Cortical Network Architecture during Infancy. *Brain Structure & Function*, 220(2),  
583 1173–1186.
- 584 Gao, W., Lin, W., Grewen, K., & Gilmore, J. H. (2017). Functional Connectivity of the Infant  
585 Human Brain: Plastic and Modifiable. *The Neuroscientist*, 23(2), 169–184.
- 586 Gao, W., Zhu, H., Giovanello, K. S., Smith, J. K., Shen, D., Gilmore, J. H., & Lin, W. (2009).  
587 Evidence on the emergence of the brain’s default network from 2-week-old to 2-year-old  
588 healthy pediatric subjects. *Proceedings of the National Academy of Sciences*, 106(16),  
589 6790–6795.
- 590 Ge, X., Shi, Y., Li, J., Zhang, Z., Lin, X., Zhan, J., Ge, H., Xu, J., Yu, Q., Leng, Y., Teng, G.,  
591 Feng, L., Meng, H., Tang, Y., Zang, F., Toga, A. W., & Liu, S. (2015). Development of  
592 the human fetal hippocampal formation during early second trimester. *NeuroImage*, 119,  
593 33–43.
- 594 Ghetti, S., DeMaster, D. M., Yonelinas, A. P., & Bunge, S. A. (2010). Developmental  
595 Differences in Medial Temporal Lobe Function during Memory Encoding. *Journal of*  
596 *Neuroscience*, 30(28), 9548–9556.
- 597 Gilmore, J. H., Shi, F., Woolson, S. L., Knickmeyer, R. C., Short, S. J., Lin, W., ... Shen, D.  
598 (2012). Longitudinal Development of Cortical and Subcortical Gray Matter from Birth to  
599 2 Years. *Cerebral Cortex*, 22(11), 2478–2485.
- 600 Glasser, M.F., et al. The minimal preprocessing pipelines for the Human Connectome Project.  
601 *Neuroimage*, 80, 105-124 (2013)

- 602 Gómez, R. L., & Edgin, J. O. (2016). The extended trajectory of hippocampal development:  
603 Implications for early memory development and disorder. *Developmental Cognitive*  
604 *Neuroscience*, *18*, 57–69.
- 605 Gogtay, N., Nugent, T. F., Herman, D. H., Ordonez, A., Greenstein, D., Hayashi, K. M., ...  
606 Thompson, P. M. (2006). Dynamic mapping of normal human hippocampal  
607 development. *Hippocampus*, *16*(8), 664–672.
- 608 Grayson, D. S., & Fair, D. A. (2017). Development of large-scale functional networks from birth  
609 to adulthood: A guide to the neuroimaging literature. *NeuroImage*, *160*, 15–31.
- 610 Holm, S. (1979). A simple sequentially rejective multiple test procedure. *Scandinavian Journal*  
611 *of Statistics*, *6*, 65–70
- 612 Hughes, E.J., et al. A dedicated neonatal brain imaging system. *Magn Reson Med.* *78*, 794-804  
613 (2017).
- 614 Hurk, J. van den, Baelen, M. V., & Beek, H. P. O. de. (2017). Development of visual category  
615 selectivity in ventral visual cortex does not require visual experience. *Proceedings of the*  
616 *National Academy of Sciences*, *114*(22), E4501–E4510.
- 617 Jabès, A., Lavenex, P. B., Amaral, D. G., & Lavenex, P. (2011). Postnatal development of the  
618 hippocampal formation: A stereological study in macaque monkeys. *The Journal of*  
619 *Comparative Neurology*, *519*(6), 1051–1070.
- 620 Jenkinson, M., Beckmann, C. F., Behrens, T. E. J., Woolrich, M. W., & Smith, S. M. (2012).  
621 FSL. *NeuroImage*, *62*(2), 782-790.
- 622 Keresztes, A., Ngo, C. T., Lindenberger, U., Werkle-Bergner, M., & Newcombe, N. S. (2018).  
623 Hippocampal Maturation Drives Memory from Generalization to Specificity. *Trends in*  
624 *Cognitive Sciences*, *22*(8), 676–686.

- 625 Langnes, E., Vidal-Piñeiro, D., Sneve, M. H., Amlien, I. K., Walhovd, K. B., & Fjell, A. M.  
626 (2018). Development and Decline of the Hippocampal Long-Axis Specialization and  
627 Differentiation During Encoding and Retrieval of Episodic Memories. *Cerebral Cortex*,  
628 29(8), 3398–3414.
- 629 Larson-Prior, L. J., Zempel, J. M., Nolan, T. S., Prior, F. W., Snyder, A. Z., & Raichle, M. E.  
630 (2009). Cortical network functional connectivity in the descent to sleep. *Proceedings of the*  
631 *National Academy of Sciences*, 106(11), 4489–4494.
- 632 Lavenex, P., & Banta Lavenex, P. (2013). Building hippocampal circuits to learn and remember:  
633 Insights into the development of human memory. *Behavioural Brain Research*, 254, 8–21.
- 634 Lin, W., Zhu, Q., Gao, W., Chen, Y., Toh, C.-H., Styner, M., ... Gilmore, J. H. (2008).  
635 Functional Connectivity MR Imaging Reveals Cortical Functional Connectivity in the  
636 Developing Brain. *American Journal of Neuroradiology*, 29(10), 1883–1889.
- 637 Linke, A. C., Wild, C., Zubiaurre-Elorza, L., Herzmann, C., Duffy, H., Han, V. K., Lee, D. S. C.,  
638 & Cusack, R. (2018). Disruption to functional networks in neonates with perinatal brain  
639 injury predicts motor skills at 8 months. *NeuroImage. Clinical*, 18, 399–406.
- 640 Liu, W.-C., Flax, J. F., Guise, K. G., Sukul, V., & Benasich, A. A. (2008). Functional  
641 connectivity of the sensorimotor area in naturally sleeping infants. *Brain Research*, 1223,  
642 42–49.
- 643 Liu, X., Yanagawa, T., Leopold, D. A., Fujii, N., & Duyn, J. H. (2015). Robust Long-Range  
644 Coordination of Spontaneous Neural Activity in Waking, Sleep and Anesthesia. *Cerebral*  
645 *Cortex*, 25(9), 2929–2938.
- 646 Makropoulos, A., et al. Automatic whole brain MRI segmentation of the developing neonatal  
647 brain. *IEEE Transactions on Medical Imaging*, 33, 1818-1831 (2014).

- 648 Makropoulos, A., et al. The developing human connectome project: A minimal processing  
649 pipeline for neonatal cortical surface reconstruction. *Neuroimage*, *173*, 88-112 (2018).
- 650 Murphy, K., & Fox, M. D. (2017). Towards a consensus regarding global signal regression for  
651 resting state functional connectivity MRI. *NeuroImage*, *154*, 169–173.
- 652 Mitra, A., Snyder, A. Z., Tagliazucchi, E., Laufs, H., Elison, J., Emerson, R. W., Shen, M. D.,  
653 Wolff, J. J., Botteron, K. N., Dager, S., Estes, A. M., Evans, A., Gerig, G., Hazlett, H. C.,  
654 Paterson, S. J., Schultz, R. T., Styner, M. A., Zwaigenbaum, L., IBIS Network, ...  
655 Raichle, M. (2017). Resting-state fMRI in sleeping infants more closely resembles adult  
656 sleep than adult wakefulness. *PloS One*, *12*(11),
- 657 Natu, V. S., Gomez, J., Barnett, M., Jeska, B., Kirilina, E., Jaeger, C., Zhen, Z., Cox, S., Weiner,  
658 K. S., Weiskopf, N., & Grill-Spector, K. (2019). Apparent thinning of human visual  
659 cortex during childhood is associated with myelination. *Proceedings of the National*  
660 *Academy of Sciences of the United States of America*, *116*(41), 20750–20759.
- 661 Ofen, N., Kao, Y.-C., Sokol-Hessner, P., Kim, H., Whitfield-Gabrieli, S., & Gabrieli, J. D. E.  
662 (2007). Development of the declarative memory system in the human brain. *Nature*  
663 *Neuroscience*, *10*, 1198.
- 664 Osher, D. E., Brissenden, J. A., & Somers, D. C. (2019). Predicting an individual's dorsal  
665 attention network activity from functional connectivity fingerprints. *Journal of*  
666 *Neurophysiology*, *122*(1), 232–240.
- 667 Poppenk, J., Evensmoen, H. R., Moscovitch, M., & Nadel, L. (2013). Long-axis specialization of  
668 the human hippocampus. *Trends in Cognitive Sciences*, *17*(5), 230–240.

- 669 Poppenk, J., & Moscovitch, M. (2011). A Hippocampal Marker of Recollection Memory Ability  
670 among Healthy Young Adults: Contributions of Posterior and Anterior Segments.  
671 *Neuron*, 72(6), 931–937.
- 672 Power, J. D., Barnes, K. A., Snyder, A. Z., Schlaggar, B. L., & Petersen, S. E. (2012). Spurious  
673 but systematic correlations in functional connectivity MRI networks arise from subject  
674 motion. *NeuroImage*, 59(3), 2142–2154.
- 675 Power, J. D., Mitra, A., Laumann, T. O., Snyder, A. Z., Schlaggar, B. L., & Petersen, S. E.  
676 (2014). Methods to detect, characterize, and remove motion artifact in resting state fMRI.  
677 *NeuroImage*, 84, 320–341.
- 678 Prabhakar, J., Johnson, E. G., Nordahl, C. W., & Ghetti, S. (2018). Memory-related hippocampal  
679 activation in the sleeping toddler. *Proceedings of the National Academy of Sciences of the*  
680 *United States of America*, 115(25), 6500–6505. <https://doi.org/10.1073/pnas.1805572115>
- 681 Raichle, M. E. (2009). A Paradigm Shift in Functional Brain Imaging. *Journal of Neuroscience*,  
682 29(41), 12729–12734.
- 683 Riggins, T., Geng, F., Blankenship, S. L., & Redcay, E. (2016). Hippocampal functional  
684 connectivity and episodic memory in early childhood. *Developmental Cognitive*  
685 *Neuroscience*, 19, 58–69
- 686 Roffwarg, H. P., Muzio, J. N., & Dement, W. C. (1966). Ontogenetic development of the human  
687 sleep-dream cycle. *Science (New York, N.Y.)*, 152(3722), 604–619.
- 688 Salimi-Khorshidi, G., et al. Automatic denoising of functional MRI data: combining 409  
689 independent component analysis and hierarchical fusion of classifiers. *Neuroimage*, 90,  
690 449-468 (2014)



- 691 Salzwedel, A. P., Stephens, R. L., Goldman, B. D., Lin, W., Gilmore, J. H., & Gao, W. (2019).  
692 Development of Amygdala Functional Connectivity During Infancy and Its Relationship  
693 With 4-Year Behavioral Outcomes. *Biological Psychiatry: Cognitive Neuroscience and*  
694 *Neuroimaging*, 4(1), 62–71.
- 695 Satterthwaite, T. D., Elliott, M. A., Gerraty, R. T., Ruparel, K., Loughhead, J., Calkins, M. E., ...  
696 Wolf, D. H. (2013). An improved framework for confound regression and filtering for  
697 control of motion artifact in the preprocessing of resting-state functional connectivity data.  
698 *NeuroImage*, 64, 240–256.
- 699 Seress, L. (2007). Comparative anatomy of the hippocampal dentate gyrus in adult and  
700 developing rodents, non-human primates and humans. In H. E. Scharfman (Ed.),  
701 *Progress in Brain Research* (pp. 23–798).
- 702 Smith, S. M., Fox, P. T., Miller, K. L., Glahn, D. C., Fox, P. M., Mackay, C. E., ... Beckmann,  
703 C. F. (2009). Correspondence of the brain's functional architecture during activation and  
704 rest. *Proceedings of the National Academy of Sciences of the United States of America*,  
705 106(31), 13040–13045.
- 706 Smith, S. M., & Nichols, T. E. (2009). Threshold-free cluster enhancement: Addressing  
707 problems of smoothing, threshold dependence and localisation in cluster inference.  
708 *NeuroImage*, 44(1), 83–98.
- 709 Smith, S. M., Vidaurre, D., Beckmann, C. F., Glasser, M. F., Jenkinson, M., Miller, K. L., ...  
710 Van Essen, D. C. (2013). Functional connectomics from resting-state fMRI. *Trends in*  
711 *Cognitive Sciences*, 17(12), 666–682.
- 712 Snedecor, GW, Cochran, WG - Ames: Iowa State Univ. Press Iowa, 1989

- 713 Sporns, O. (2013). Structure and function of complex brain networks. *Dialogues in Clinical*  
714 *Neuroscience*, 15(3), 247–262.
- 715 Strange, B. A., Witter, M. P., Lein, E. S., & Moser, E. I. (2014). Functional organization of the  
716 hippocampal longitudinal axis. *Nature Reviews Neuroscience*, 15(10), 655–669.
- 717 Thompson, D. K., Wood, S. J., Doyle, L. W., Warfield, S. K., Lodygensky, G. A., Anderson, P.  
718 J., Egan, G. F., & Inder, T. E. (2008). Neonate hippocampal volumes: Prematurity,  
719 perinatal predictors, and 2-year outcome. *Annals of Neurology*, 63(5), 642–651.
- 720 Tobyne, S. M., Somers, D. C., Brissenden, J. A., Michalka, S. W., Noyce, A. L., & Osher, D. E.  
721 (2018). Prediction of individualized task activation in sensory modality-selective frontal  
722 cortex with ‘connectome fingerprinting.’ *NeuroImage*, 183, 173–185.
- 723 Travaglia, A., Steinmetz, A. B., Miranda, J. M., & Alberini, C. M. (2018). Mechanisms of  
724 critical period in the hippocampus underlie object location learning and memory in infant  
725 rats. *Learning & Memory*, 25(4), 176–182.
- 726 Wael, R. V. de, Larivière, S., Caldairou, B., Hong, S.-J., Margulies, D. S., Jefferies, E., ...  
727 Bernhardt, B. C. (2018). Anatomical and microstructural determinants of hippocampal  
728 subfield functional connectome embedding. *Proceedings of the National Academy of*  
729 *Sciences*, 115(40), 10154–10159.
- 730 Wheelock, M. D., Hect, J. L., Hernandez-Andrade, E., Hassan, S. S., Romero, R., Eggebrecht, A.  
731 T., & Thomason, M. E. (2019). Sex differences in functional connectivity during fetal brain  
732 development. *Developmental Cognitive Neuroscience*, 36, 100632.
- 733 Yan, C.-G., Cheung, B., Kelly, C., Colcombe, S., Craddock, R. C., Di Martino, A., ... Milham,  
734 M. P. (2013). A comprehensive assessment of regional variation in the impact of head  
735 micromovements on functional connectomics. *NeuroImage*, 76, 183–201.

736 Yeo, B. T., Krienen, F. M., Sepulcre, J., Sabuncu, M. R., Lashkari, D., Hollinshead, M., ...  
737 Buckner, R. L. (2011). The organization of the human cerebral cortex estimated by  
738 intrinsic functional connectivity. *Journal of Neurophysiology*, 106(3), 1125–1165.

## 739 **Legends**

740

741 **Figure 1: Preliminary Data Checks** a) Gray matter (red), white matter (yellow) and network  
742 registrations on the anatomical images of a representative adult and neonate subject; registration  
743 image: blue=hippocampus, white = Vis, red = SM, purple (dark) = DA, pink = VA, green = Lim,  
744 yellow = FP, orange = DM b) voxelwise correlations distributions of a representative adult and  
745 neonate c) between-subject and between-group correlations demonstrate high within-group  
746 reliability of connectivity but low between-group reliability between adults and neonates. (\*)  
747 indicates significance at  $p < 0.05$ ; ns denotes non-significance

748 **Figure 1-1: tSNR-Matched Adult Hippocampus to Networks.** Hippocampal-network  
749 connectivity of 40 tSNR-matched HCP adults again shows very similar results to the motion-  
750 matched and binarized-hippocampal analyses. Hippocampal connectivity in adults shows a clear  
751 hierarchy, with strong positive connectivity to Lim and DMN and negative connectivity to FP  
752 and VA (\*) indicates significance at  $p_{HB} < 0.05$ ; (\*\*\*) indicates significance at  $p_{HB} < 0.005$ .

753 **Figure 2: Hippocampal Connectivity to Cortical Networks** a) Comparison of hippocampal  
754 connectivity to the seven cortical networks in adults showed a hierarchy of hippocampal  
755 connectivity, whereby the highest FC was with Lim, followed by DM, SM, and Vis, almost no  
756 FC with DA, and negative FC with FP and VA. b) In contrast, neonates show the same level of  
757 FC to almost all of the 7 networks. Rose plot to the right shows adult connectivity compared to  
758 neonates to highlight the differences between groups in the pattern of hippocampal FC to these

759 networks. Brain images on the top right depict connectivity between the hippocampus (left) and  
760 the seven cortical networks (right). (\*) indicates significance at  $p_{HB} < 0.05$ ; (\*\*\*) indicates  
761 significance at  $p_{HB} < 0.005$ . Lim=Limbic; DM=Default Mode; SM=Somatomotor; Vis=visual;  
762 DA=Dorsal Attention; FP=FrontoParietal; VA=Ventral Attention

763 **Figure 2-1: Binarized Whole Hippocampus to Networks.** Hippocampal connectivity to the  
764 networks using a binarized HCP/dHCP hippocampal ROI yields very similar results to the ANTs  
765 registered hippocampal ROI (see figure 2). As with the initial analysis, hippocampal connectivity  
766 in adults shows a clear hierarchy whereas neonates display very few differences in hippocampal  
767 connectivity strength to the networks. (\*) indicates significance at  $p_{HB} < 0.05$ ; (\*\*\*) indicates  
768 significance at  $p_{HB} < 0.005$ .

769

770

771 **Figure 3: Hippocampal Connectivity to Cortex.** Comparison of adult and neonate  
772 hippocampal connectivity to the cortex at a voxelwise grain. FWE-corrected results for the  
773 contrast of neonate > adult connectivity is shown in warm colors and the contrast of adult >  
774 neonate is denoted by cool colors.

775

776 **Figure 3-1: Hippocampal Connectivity to Cortex, Adult>Neo** Clusters are listed from largest  
777 to smallest. Peak coordinates (MAX) are listed in MNI space as well as center of gravity (COG)  
778 for each cluster

779 **Figure 3-2: Hippocampal Connectivity to Cortex, Neo>Adult** Clusters are listed from largest  
780 to smallest. Peak coordinates (MAX) are listed in MNI space as well as center of gravity (COG)  
781 for each cluster

782

783 **Figure 4: Anterior/Posterior Hippocampal Connectivity to Networks** a) Anterior vs  
784 posterior hippocampal-network connectivity in adults b) Anterior vs posterior hippocampal-  
785 network connectivity in neonates c) Rose plot comparing anterior vs posterior hippocampal-  
786 network connectivity pattern in adults d) Rose plot comparing anterior vs posterior hippocampal-  
787 network connectivity pattern in neonates. Brain image to the right shows the anterior (red) and  
788 posterior (yellow) hippocampal labels (\*) indicates significance at  $p_{HB} < 0.05$ ; (\*\*\*) indicates  
789 significance at  $p_{HB} < 0.005$ .

790 **Figure 5: Connectivity along the Long-Axis Gradient to Networks** Comparison of the  
791 connectivity of the long axis gradient of the hippocampus to the 7 networks in a) adults and b)  
792 neonates. The slices are arranged anterior-to-posterior. Lighter coloring surrounding each line  
793 represents the standard error. Brain image on the right demonstrates the hippocampus (blue)  
794 segmented into slices (white lines). (\*) are slices where the ANOVA shows an interaction  
795 between network and group at  $p < 0.001$ .

796

797

798

799

800 **Figures**

801

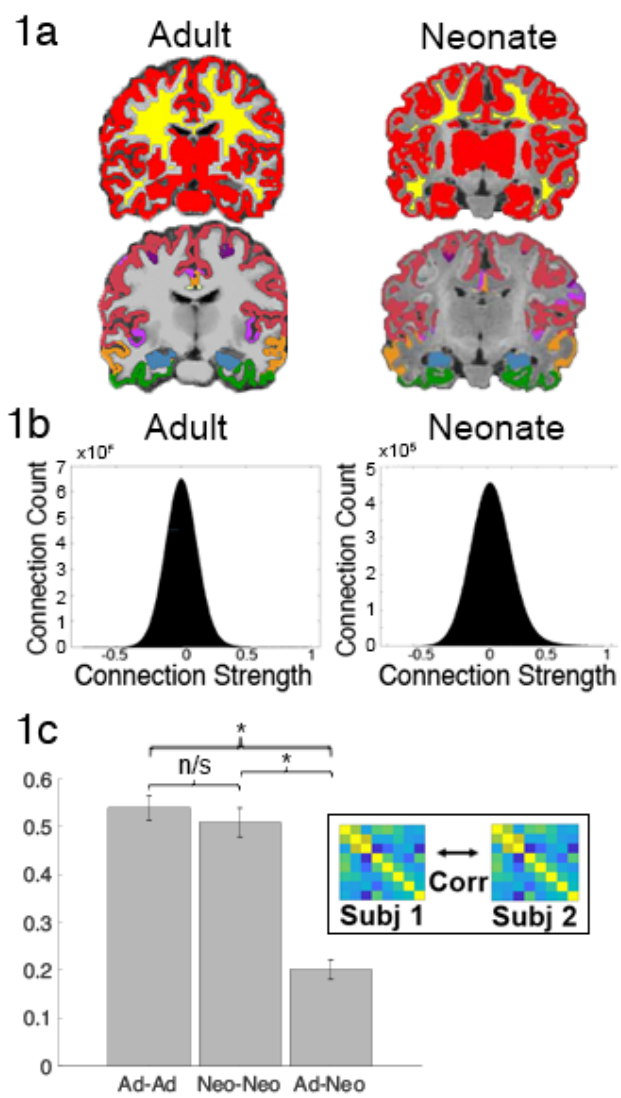

802 (Figure 1)

803

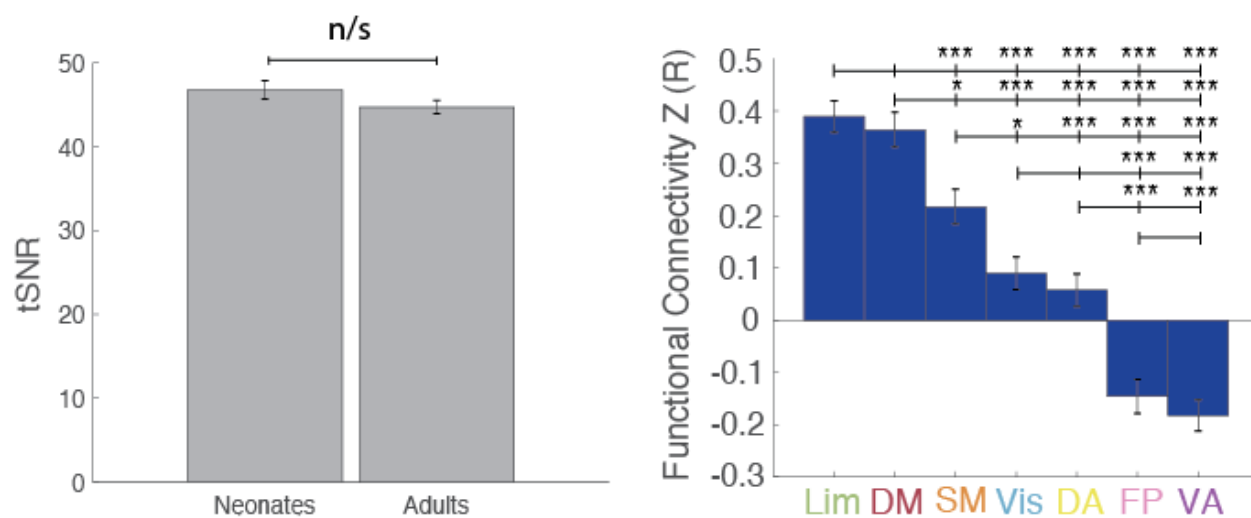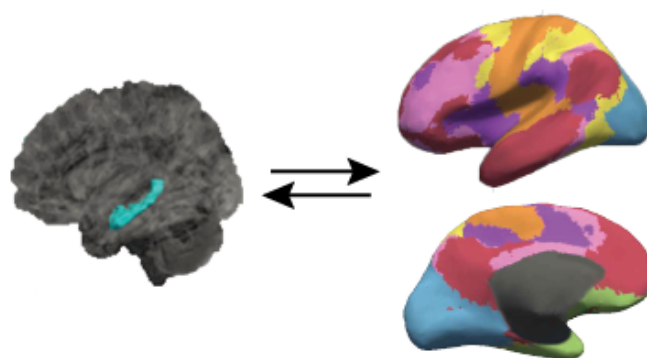

804 (Extended Data for Figure 1, Figure 1-1)

805

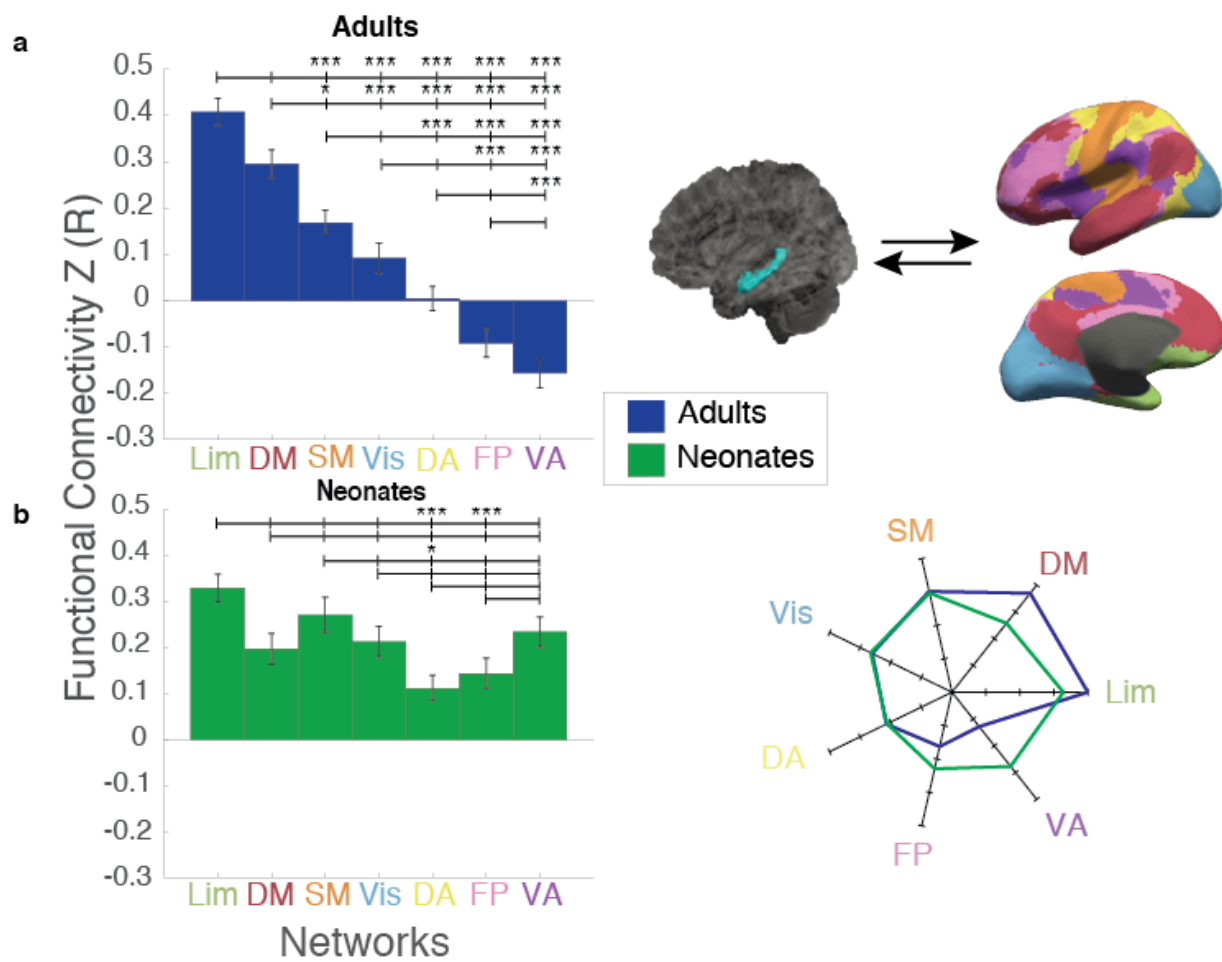

806

807 (Figure 2)

808



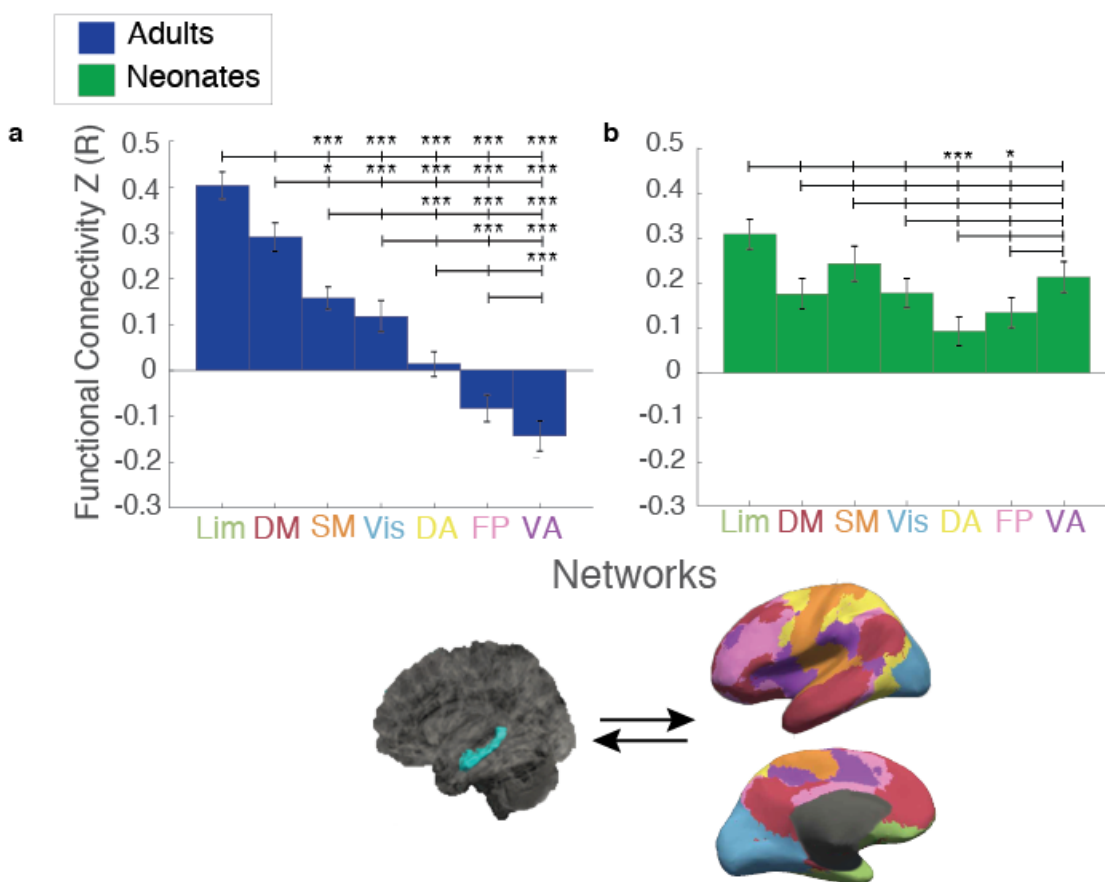

809

810 (Extended data for Figure 2; Figure 2-1)

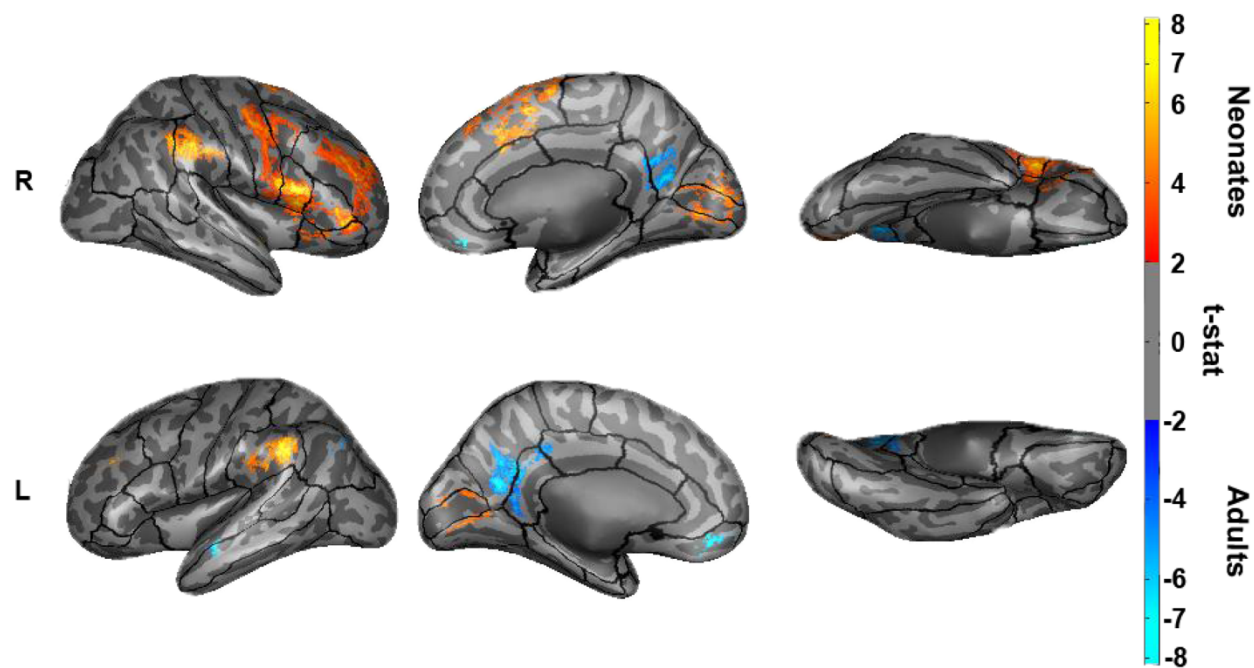

811

812 (Figure 3)

| <i>Cluster</i> | <i>Regions</i>                                           | <i>Voxels</i> | <i>MAX</i> | <i>MAX</i><br><i>(X)</i> | <i>MAX</i><br><i>(Y)</i> | <i>MAX</i><br><i>(Z)</i> | <i>COG</i><br><i>(X)</i> | <i>COG</i><br><i>(Y)</i> | <i>COG</i><br><i>(Z)</i> |
|----------------|----------------------------------------------------------|---------------|------------|--------------------------|--------------------------|--------------------------|--------------------------|--------------------------|--------------------------|
| 1              | (L) Posterior Cingulate; Isthmus<br>Cingulate, Precuneus | 2370          | 8.08       | -10                      | -57                      | 17                       | -6.23                    | -55.2                    | 20.8                     |
| 2              | (R) Isthmus Cingulate;<br>Precuneus                      | 1255          | 8.27       | 15                       | -54                      | 19                       | 9.3                      | -56.1                    | 19.1                     |
| 3              | (L) Inferior Parietal                                    | 574           | 6.85       | -42                      | -77                      | 43                       | -44.3                    | -74.8                    | 39.2                     |
| 4              | (L) Middle Temporal Cortex                               | 403           | 5.72       | -62                      | -1                       | -20                      | -63.2                    | -7.54                    | -18.2                    |
| 5              | (L) Medial Orbital Frontal                               | 303           | 7.45       | -10                      | 39                       | -11                      | -7.75                    | 41.9                     | -11.7                    |
| 6              | (L) Middle Temporal Cortex;<br>Superior Temporal Cortex  | 235           | 6.88       | -52                      | -13                      | -14                      | -53.1                    | -11.6                    | -13.7                    |

813 (Extended Data for Figure 3; Figure 3-1)

814

815

816

817

818

819

820

| <i>Cluster</i> | <i>Regions</i>                                                                                                                                                 | <i>Voxels</i> | <i>MAX</i> | <i>MAX</i> | <i>MAX</i> | <i>COG</i> | <i>COG</i> <sup>44</sup> | <i>COG</i> |       |
|----------------|----------------------------------------------------------------------------------------------------------------------------------------------------------------|---------------|------------|------------|------------|------------|--------------------------|------------|-------|
|                |                                                                                                                                                                |               |            | (X)        | (Y)        | (Z)        | (X)                      | (Y)        | (Z)   |
| 1              | (R) Rostral Middle Frontal; Pars Triangularis; Pars Orbitalis; Lateral Orbitofrontal; Pars Opercularis; Insula; Caudal Middle Frontal; Precentral; Postcentral | 16290         | 8.72       | 57         | 14         | 4          | 44.9                     | 26.2       | 21.8  |
| 2              | (R) Superior Frontal; Paracentral                                                                                                                              | 4702          | 6.88       | 4          | 26         | 61         | 9.85                     | 12.7       | 59.4  |
| 3              | (L) Supramarginal                                                                                                                                              | 3278          | 8.54       | -65        | -42        | 34         | -59.6                    | -38.9      | 30.7  |
| 4              | (R) Supramarginal; Inferior Parietal                                                                                                                           | 3226          | 7.93       | 62         | -36        | 48         | 61.8                     | -35.9      | 37.1  |
| 5              | (R) Lingual; Pericalcarine (L) Lingual; Pericalcarine                                                                                                          | 2794          | 6.22       | -19        | -66        | 2          | 1.81                     | -77.1      | 5.9   |
| 6              | (L) Rostral Middle Frontal                                                                                                                                     | 796           | 6.85       | -34        | 51         | 29         | -36.3                    | 46.6       | 28.9  |
| 7              | (R) Lateral Orbitofrontal; Pars Orbitalis                                                                                                                      | 458           | 5.59       | 46         | 22         | -7         | 39.4                     | 24.6       | -7.38 |
| 8              | (L) Superior Frontal                                                                                                                                           | 350           | 5.74       | -17        | 7          | 66         | -13.6                    | 8.52       | 69.4  |
| 9              | (R) Insula                                                                                                                                                     | 238           | 5.25       | 42         | 3          | -6         | 40.4                     | 6.44       | -3.65 |

821 (Extended Data for Figure 3; Figure 3-2)

822

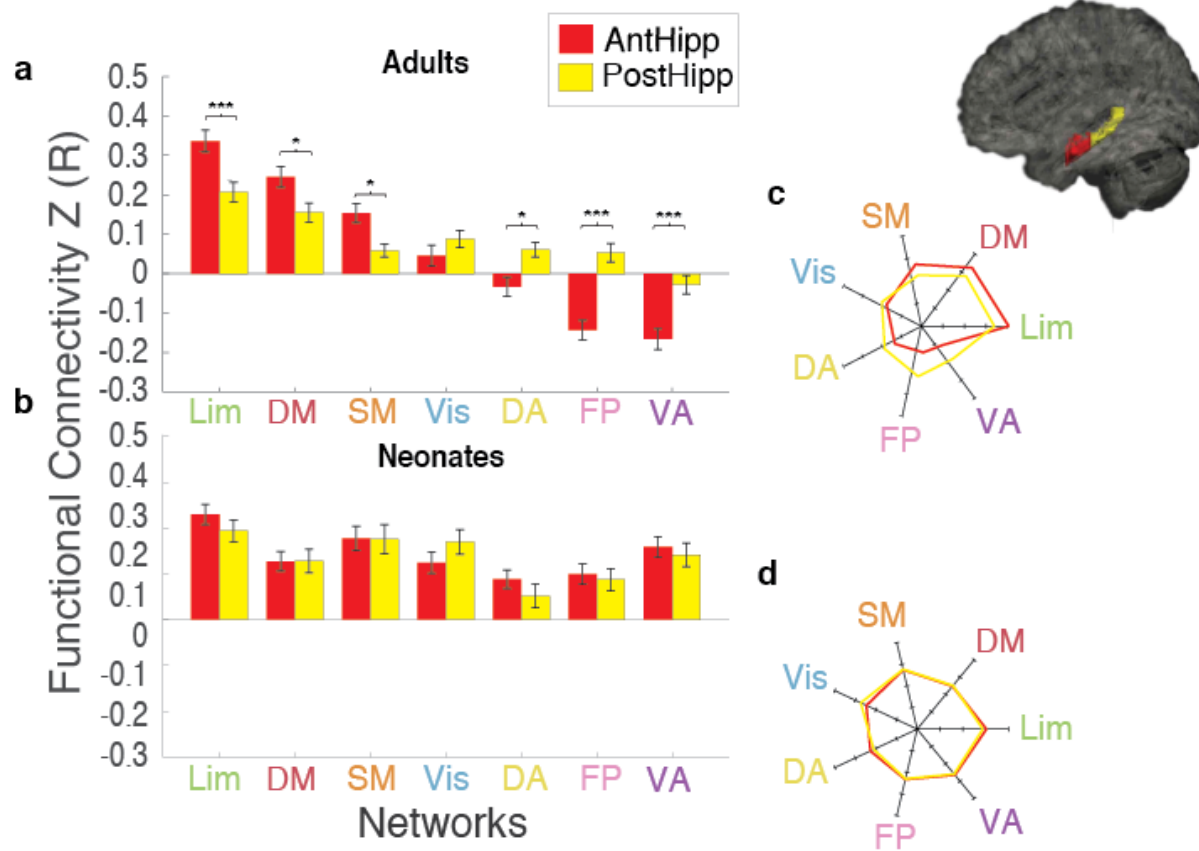

823

824 (Figure 4)

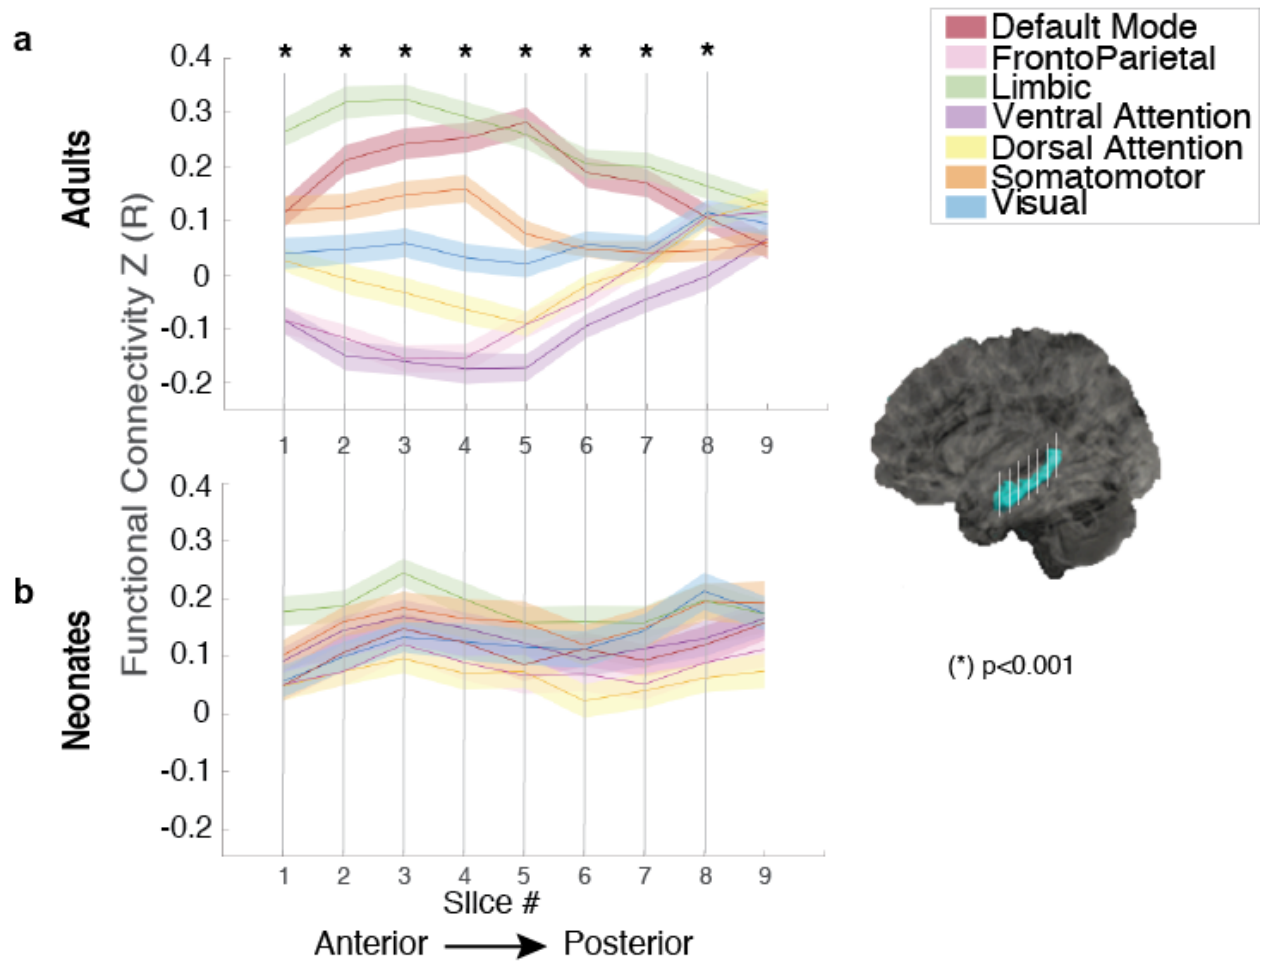

825

826 (Figure 5)

827

828

829
